# Supplementary figures and images for: The dynamin-related GTPase Opa1 is required for glucose-stimulated ATP production in pancreatic beta cells
Source: PubMed Central journal article supplement — Mol Biol Cell. 2011 Jul 1;22(13):2235–45. doi: 10.1091/mbc.E10-12-0933 (PMC3128526; doi:10.1091/mbc.e10-12-0933), 2011-07-01

(A)

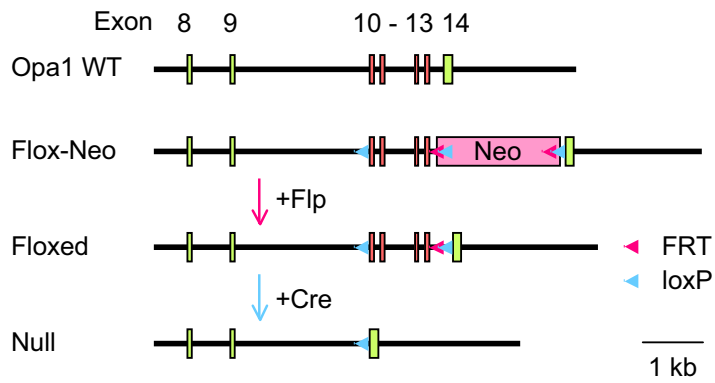

(B)

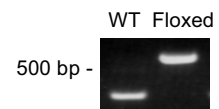

(C)

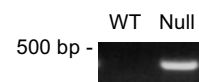

(D)

| Genotypes of pups (%) |         |         |
|-----------------------|---------|---------|
| Opa1+/+               | Opa1+/- | Opa1-/- |
| 30                    | 70      | 0       |

(E)

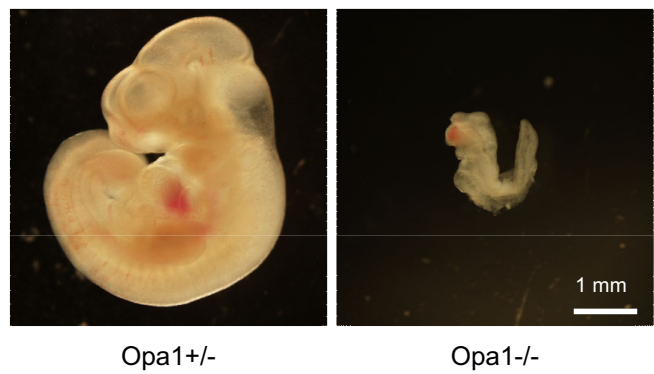

Figure S1. Zhang et al.

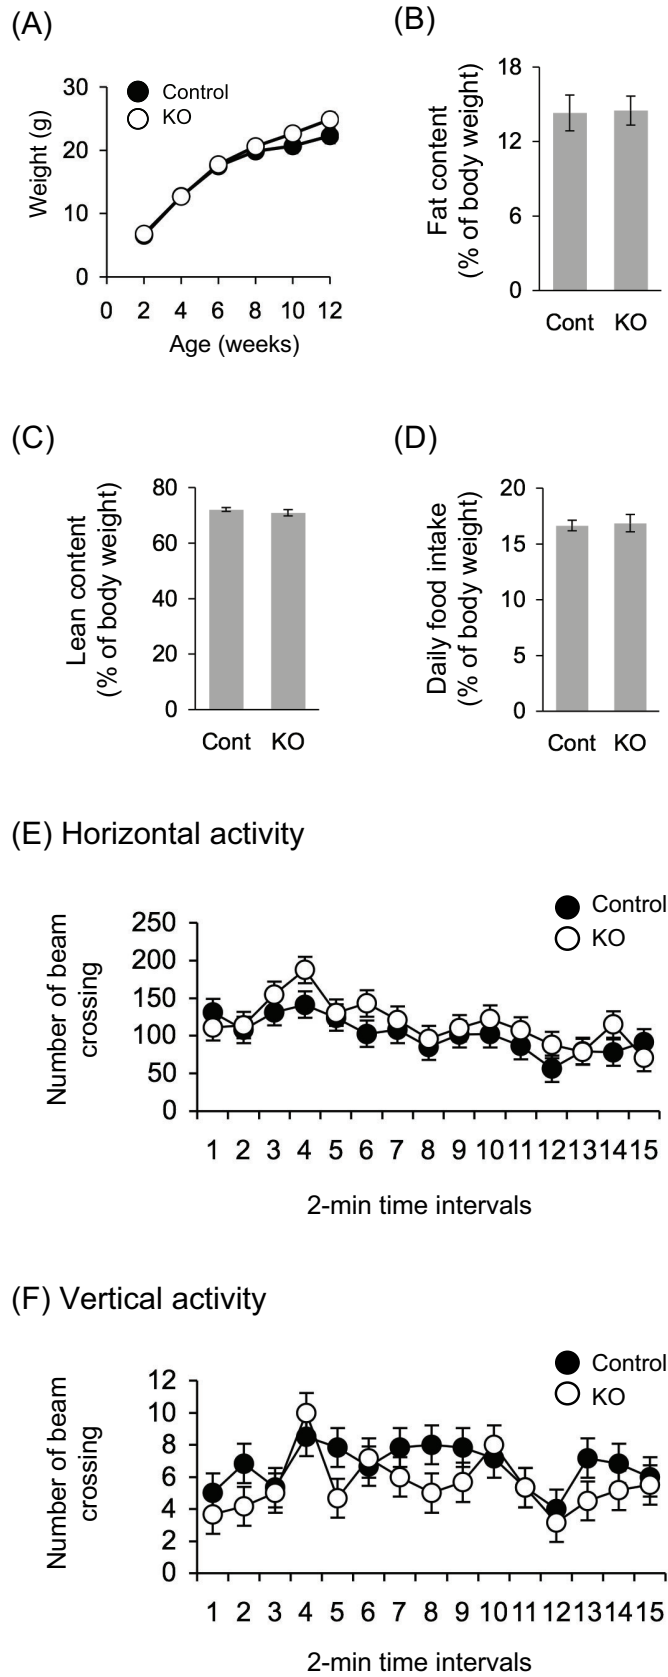

Figure S2. Zhang et al.

Supplement: E10-12-0933_1.pdf [file E10-12-0933_1.pdf]
